# Supplementary material for: Antitumor Effects of Vitamin D Analogs on Hamster and Mouse Melanoma Cell Lines in Relation to Melanin Pigmentation
Source: PubMed Central journal article supplement (PMC4424981; doi:10.3390/ijms16046645), 2015-03-24
Supplement: ijms-16-06645-s001.pdf [file ijms-16-06645-s001.pdf]

# Supplementary Information

## TYR

Ab ATGACAAA--CCAAAACCCCGAGGCTCCCATCTTCGGCAGATGTGGAATTTTGTCTGACTT 59  
Mus ATGACAAAAGCCAAAACCCCGAGGCTCCCATCTTCAGCAGATGTGGAATTTTGTCTGAGTT 60  
Rattus ATGACAAAAGCCAAAACCCCGAGGCTCCCATCTTCAGCAGACGTGGAATTTTGTCTGAGTT 60

Ab TAACCCAGTATGAAGCTGGCTCCATGGATAAACTGCCAATTTTCAGCTTTAGAAACACAC 119  
Mus TGACCCAGTATGAATCTGGATCAATGGATAGAACTGCCAATTTTCAGCTTTAGAAACACAC 120  
Rattus TGACCCAGTATGAATCTGGATCAATGGATAGAACTGCCAATTTTCAGCTTTAGAAACACAC 120

Ab TGGAAGGATTTGCAAATCCACTCACAGGGATAGCAGAA 157  
Mus TGGAAGGATTTGCCAGTCCACTCACAGGGATAGCAGAT 158  
Rattus TGGAAGGATTTGCCAGTCCACTCACAGGGATAGCAGAT 158

MusmusculusGenBank: AK014619.1

RattusNCBI Reference Sequence: NM\_001107535.1

## PDIA3

Ab GGGCTCATGCTAGTCGAGTTCTTCGCCCTTGGTGTGGACATTGCAAGAGGCTTGCCCT 60  
Mus GGGCTCATGCTAGTCGAGTTCTTCGCCCTTGGTGTGGACATTGCAAGAGGCTTGCCCT 60  
Rattus GGGCTCATGCTAGTCGAGTTCTTCGCCCTTGGTGTGGACATTGCAAGAGGCTTGCCCT 60

Ab GAGTATGAAGCTGCAGCAA 79  
Mus GAGTATGAAGCTGCAGCAA 79  
Rattus GAGTATGAAGCTGCAGCAA 79

MusMusculus GenBank: BC003285.1

Rattus GenBank: DY311951.1

## CYP24A1

Ab AAAGAACTATATGCTGCGGCTCACTGAGCTCCAGCTTGTGTCAGTGGAGACGACAGCCAAC 60  
Mus AAAGAACTGTACGCTGCTGTACGGAGCTCCAGCTGGTGTGTCAGTGGAGACGACCGCAAAC 60  
Rattus AAGGAAGTGTACGCCGCTGTACGGAGCTGCAGCTCGTGTGTCAGTGGAGACGACCGCGAAC 60

Ab AGCCTGATGTGGGTCTCTACAACCTATGCCGGAATCCCCAAGTGCAGCAGAGACTTCTC 120  
Mus AGCTTGATGTGGATTCTCTACAATCTATCCCAGGAATCCCCAAGTGCACAGAGACTTCTC 120  
Rattus AGCTTGATGTGGATTCTCTACAATCTATCCCAGGAATCCTCAAGCGCAACGGAGACTCCTT 120

Ab CTGGAAATCCAGAGCGTGCTACCCGGGAACAGATGCCACGGGCAGAAAGACGTGAAGAAT 180  
Mus CGGGAAATCCAGAGCGTGCTGCTGACAACAGACGCCACGGGCGGAAGATGTGAGGAAT 180  
Rattus CAGGAAGTTCAGAGCGTGCTGCTGACAATCAGACGCCACGGGCGGAAGACCTGAGGAAT 180

Ab ATGCCCTATTTAAAGGCCTG 200  
Mus ATGCCCTATTTAAAGGCCTG 200  
Rattus ATGCCCTATTTAAAGGCCTG 200

MusMusculus GenBank: AK143984.1

Rattus NCBI Reference Sequence: NM\_201635.2

**Figure S1.** Comparison of fragments of coding sequences of the hamster (*Mesocricetus auratus*) tyrosinase (TYR), disulfide isomerase (PDIA3) and 24-hydroxylase (CYP24A1) genes, obtained after isolation of the PCR fragments isolated from the gel and sequencing. Newly acquired hamster sequences were compared with the DNA sequences of mice (*Mus musculus*) and rat (*Rattus norvegicus*) from the NCBI database and Gen Bank *Mus musculus* GenBank AK014619.1, *Rattus norvegicus* NCBI NM\_001107535.1; *Mus musculus* GenBank BC003285.1, *Rattus norvegicus* GenBank DY311951.1; *Mus musculus* GenBank: AK143984.1, *Rattus norvegicus* NCBI NM\_201635.2. A 157-bp PCR fragment of the hamster *TYR* gene shared 92% identity with the mouse gene and 91% with the rat gene. A 79-bp PCR fragment of the hamster *PDIA3* gene shared 98% identity with both mouse and rat genes. A 200-bp PCR fragment of the hamster *CYP24A1* gene shared 89% identity with the mouse gene and 84% with the rat gene.

**TYR**

Ab MTNQNPQAPIFGRGILSDFGRICKSTHRDSRITQYEAGSMDKTANFSFRNT 52  
 Mus QSQNPQAPIFSRCGILSEFGRICQSTHRDSRLTQYESGSMDRTANFSFRNT 51

MusMusculus GenBank: AAA40516.1

**PDIA3**

Ab GLMLVEFFAPWCGHCKRLAPEYEAAA 26  
 Mus GLMLVEFFAPWCGHCKRLAPEYEAAA 26

Mus Musculus NCBI Reference Sequence: NP\_031978.2

**CYP24A1**

Ab KELYAAVTELQLAAVETTANSLMWILYNLSRNPQVQQRLLREIQSVLPDNQTPRAEDVRN 60  
 Mus KELYAAVTELQLAAVETTANSLMWILYNLSRNPQVQQRLLREIQSVLPDNQTPRAEDVRN 60

Ab MPYLKA 66  
 Mus MPYLKA 66

Mus musculus NCBI Reference Sequence: NP\_034126.1

**Figure S2.** Comparison of fragments of the predicted proteins of Syrian hamster (*Mesocricetus auratus*) and mouse (*Mus musculus*). Sequenced DNA fragments of the tyrosinase (Tyr), disulfide isomerase (Pdia) and 24-hydroxylase (Cyp24a1) genes were translated *in silico* and compared with the corresponding mice proteins deposited in the NCBI gene Bank with associated references as shown: Mus musculus GenBank AAA40516.1; Mus musculus NCBI Reference Sequence: NP\_031978.2; Mus musculus NCBI Reference Sequence: NP\_034126.1. *In silico* translation of *TYR*, *PDIA3* and *CYP24A1* showed that their partial protein sequences shared, 82%, 100% and 100% identity, respectively, with the corresponding murine sequences.

**Table S1.** Sequences of PCR primers used in the study.

| Primers | F:                       | R:                       |
|---------|--------------------------|--------------------------|
| B-Actin | GCTCGTCGTCGACAACGGCTC    | CAAACATGATCTGGGTCATCTTCT |
| TYR     | TATGCGATGGAACACCTGAG     | TCTGCTATCCCTGTGAGTGG     |
| VDR     | GCTGATCGAACCCCTCATAA     | TTCTGGATCATCTTGCGTA      |
| RXR     | AGGATATCAAGCCGCACTA      | TGTTGTCTCGGCAGGTGTAG     |
| CYP27A1 | TCTCTACCACCTTGCCTTGG     | TGTTATCCCAGCCATTCAGG     |
| CYP27B1 | GCTCCTGCGACAAGAAAGTC     | TCCAGAGTTCCAGCATAGCC     |
| CYP24A1 | TCAGCAGCCTAGTGCAGATTTCCC | GTCTTCACTGGATCCCAACACCTG |
| Pdia3   | CTCCGATGTGTTGGAAGTGA     | CAGGTGTTTGTGTTGGCAGT     |
